# Supplementary material
Source: ML conference proceedings conference paper supplement (https://openreview.net/forum?id=h3DDKFCOTq)

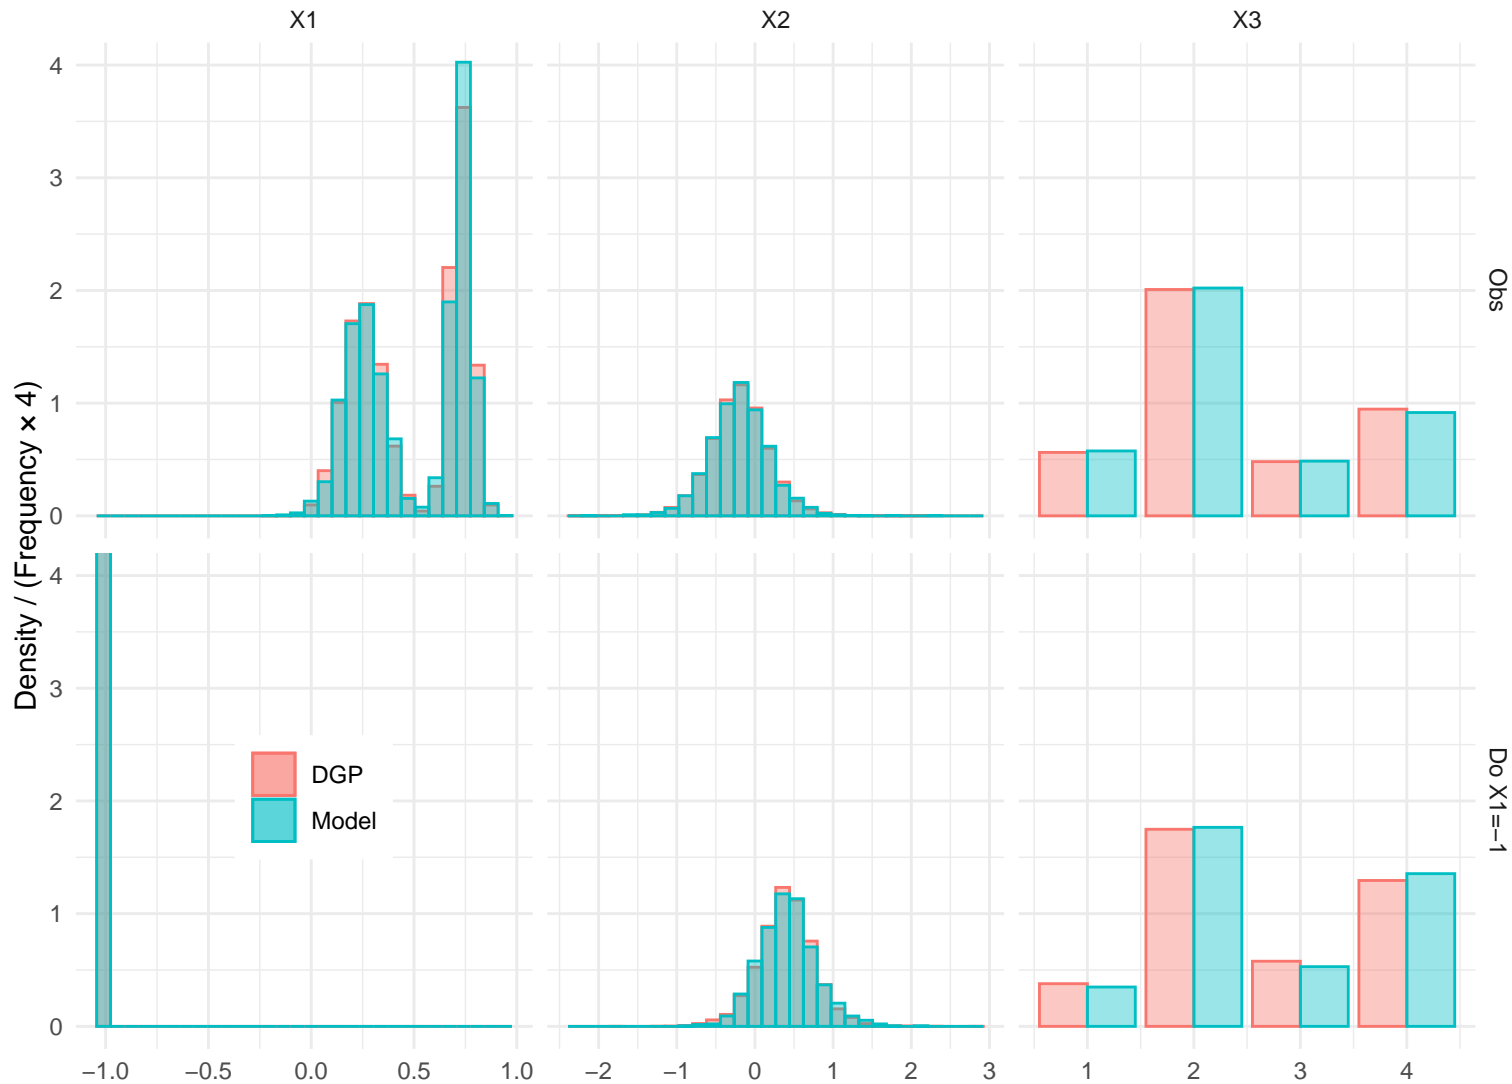

Supplement: supplementary_material [file attachment]

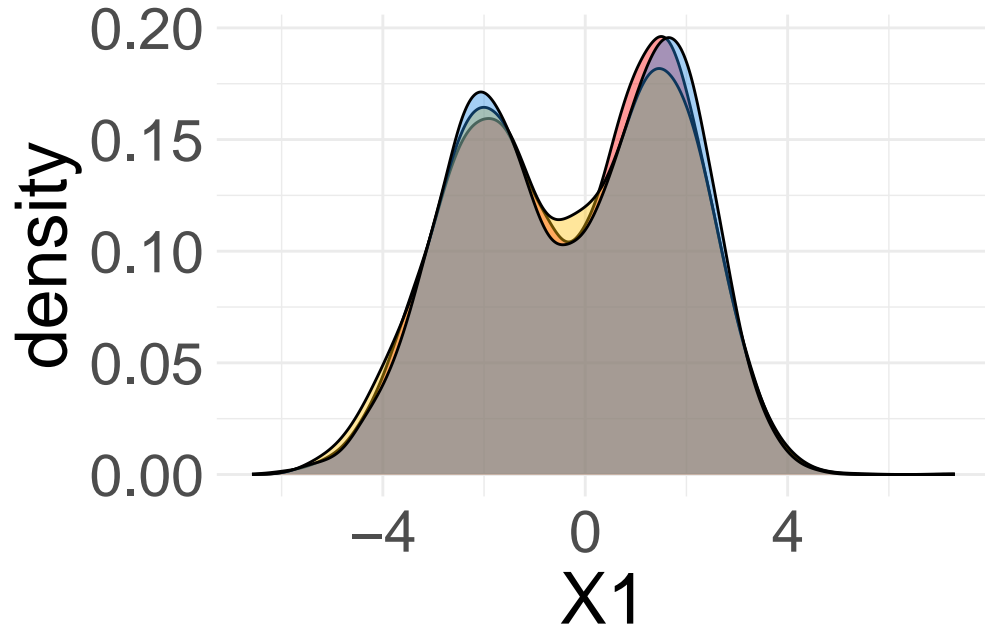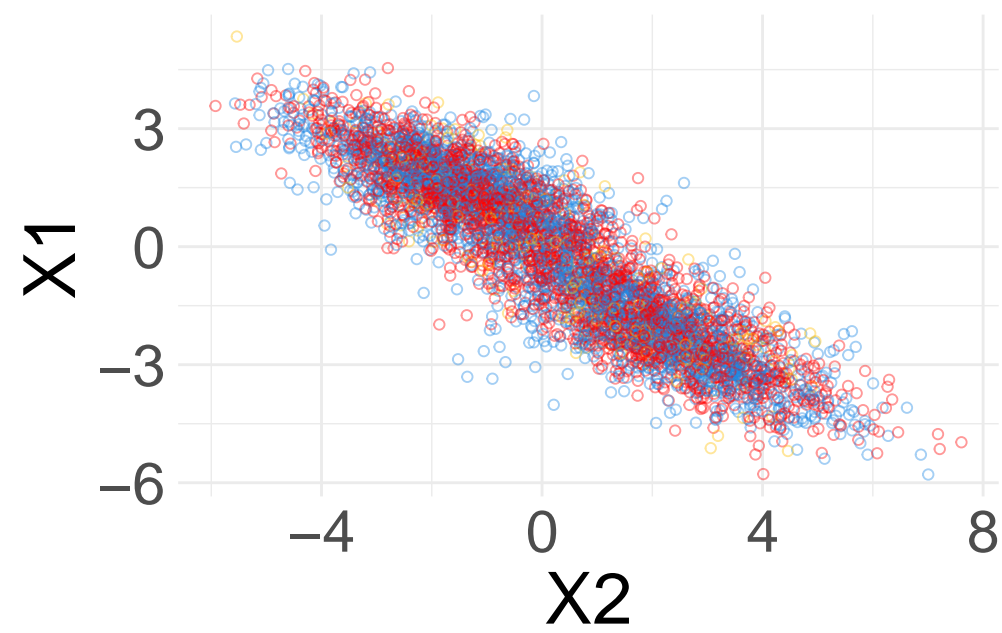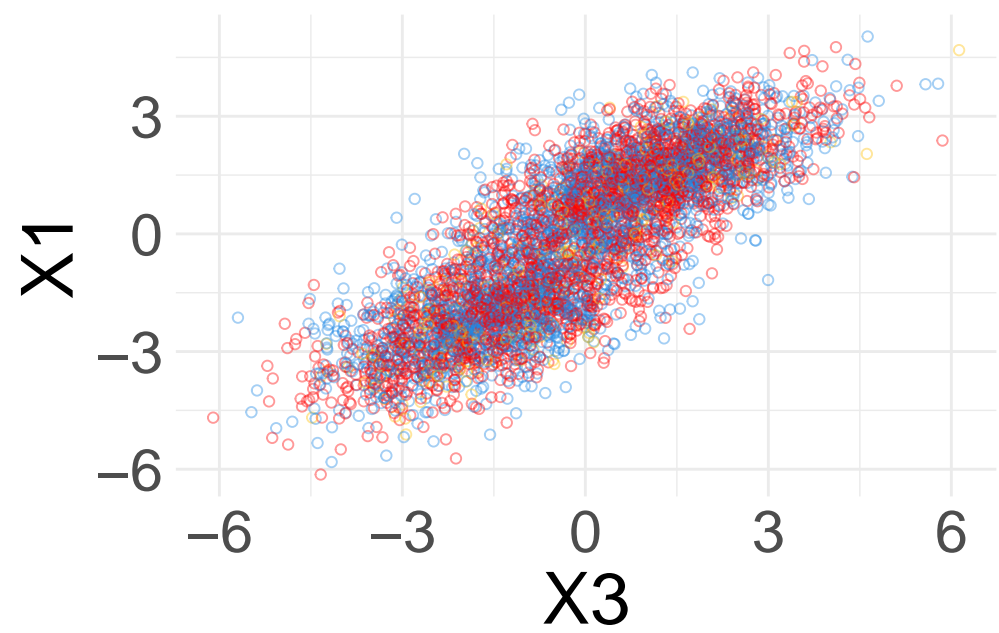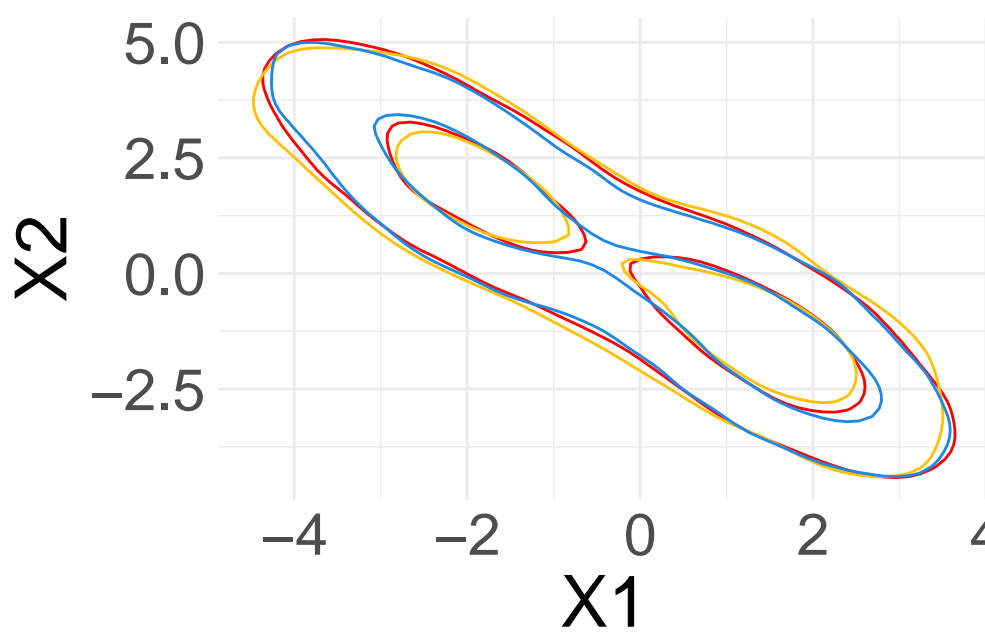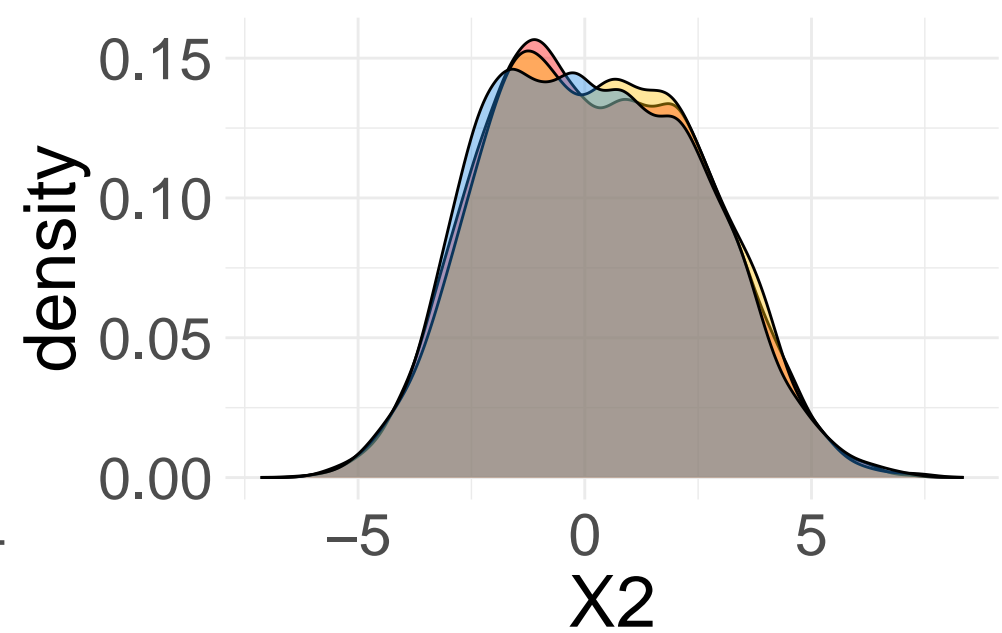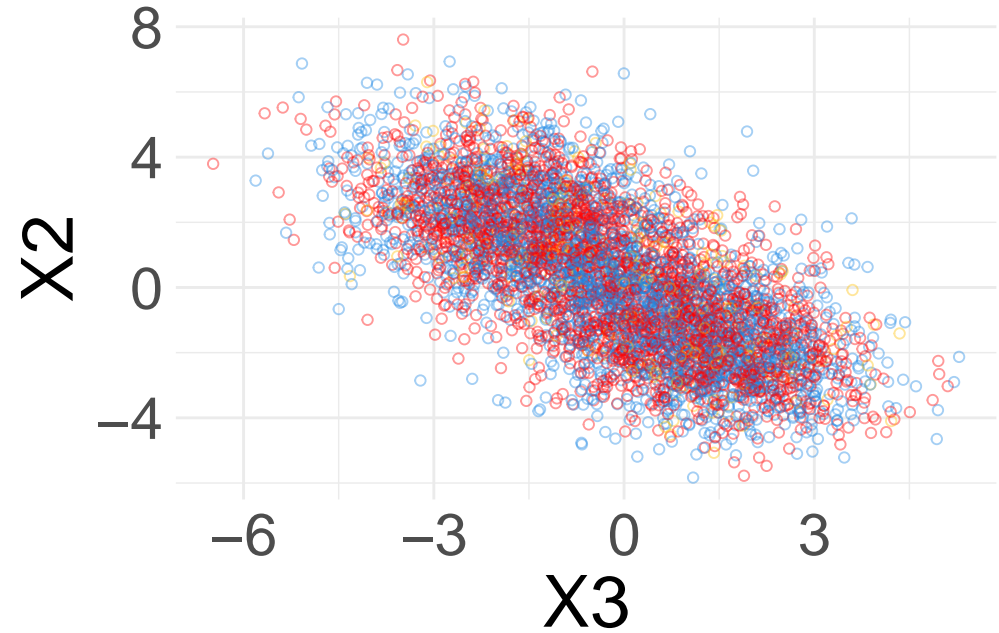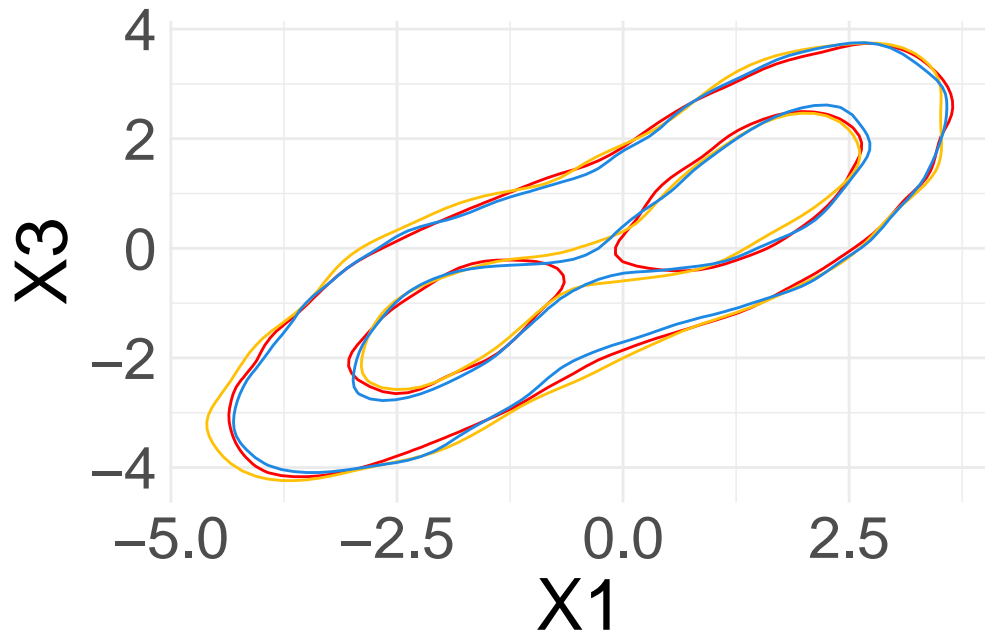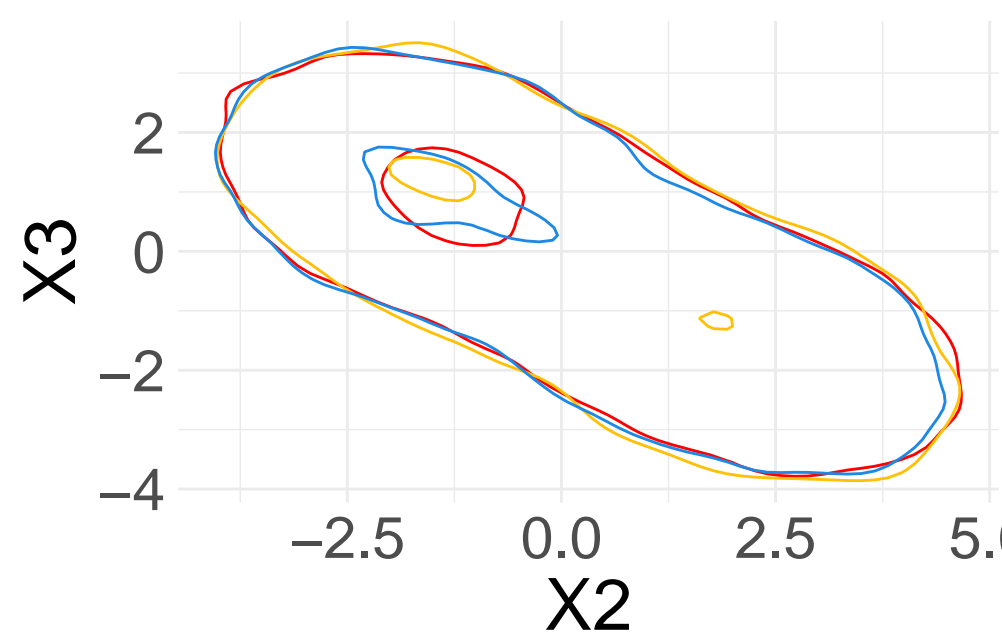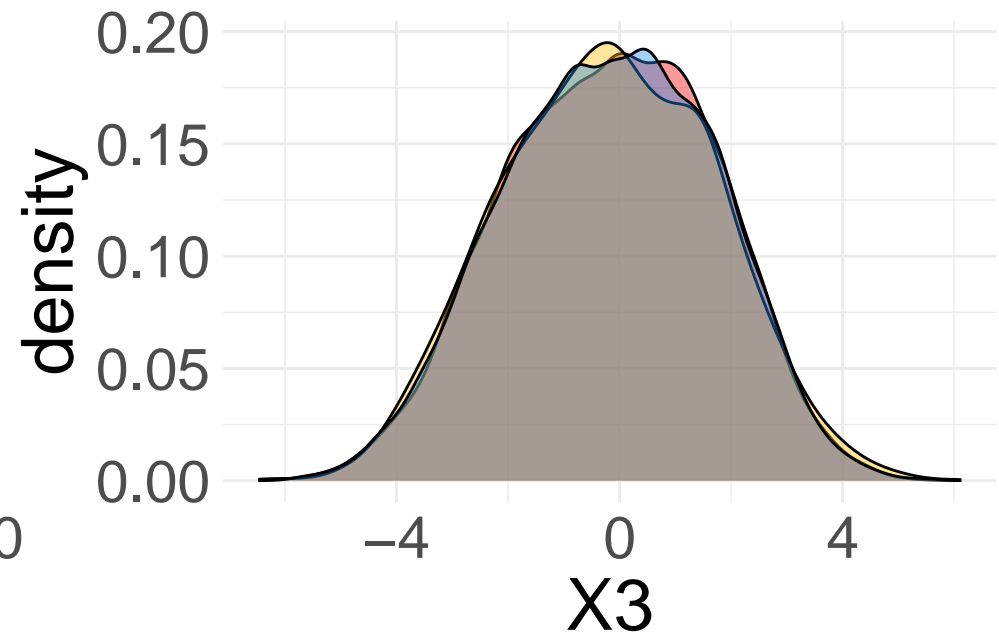

Methods ■ DGP ■ NSF ■ Ours

Supplement: supplementary_material [file attachment]

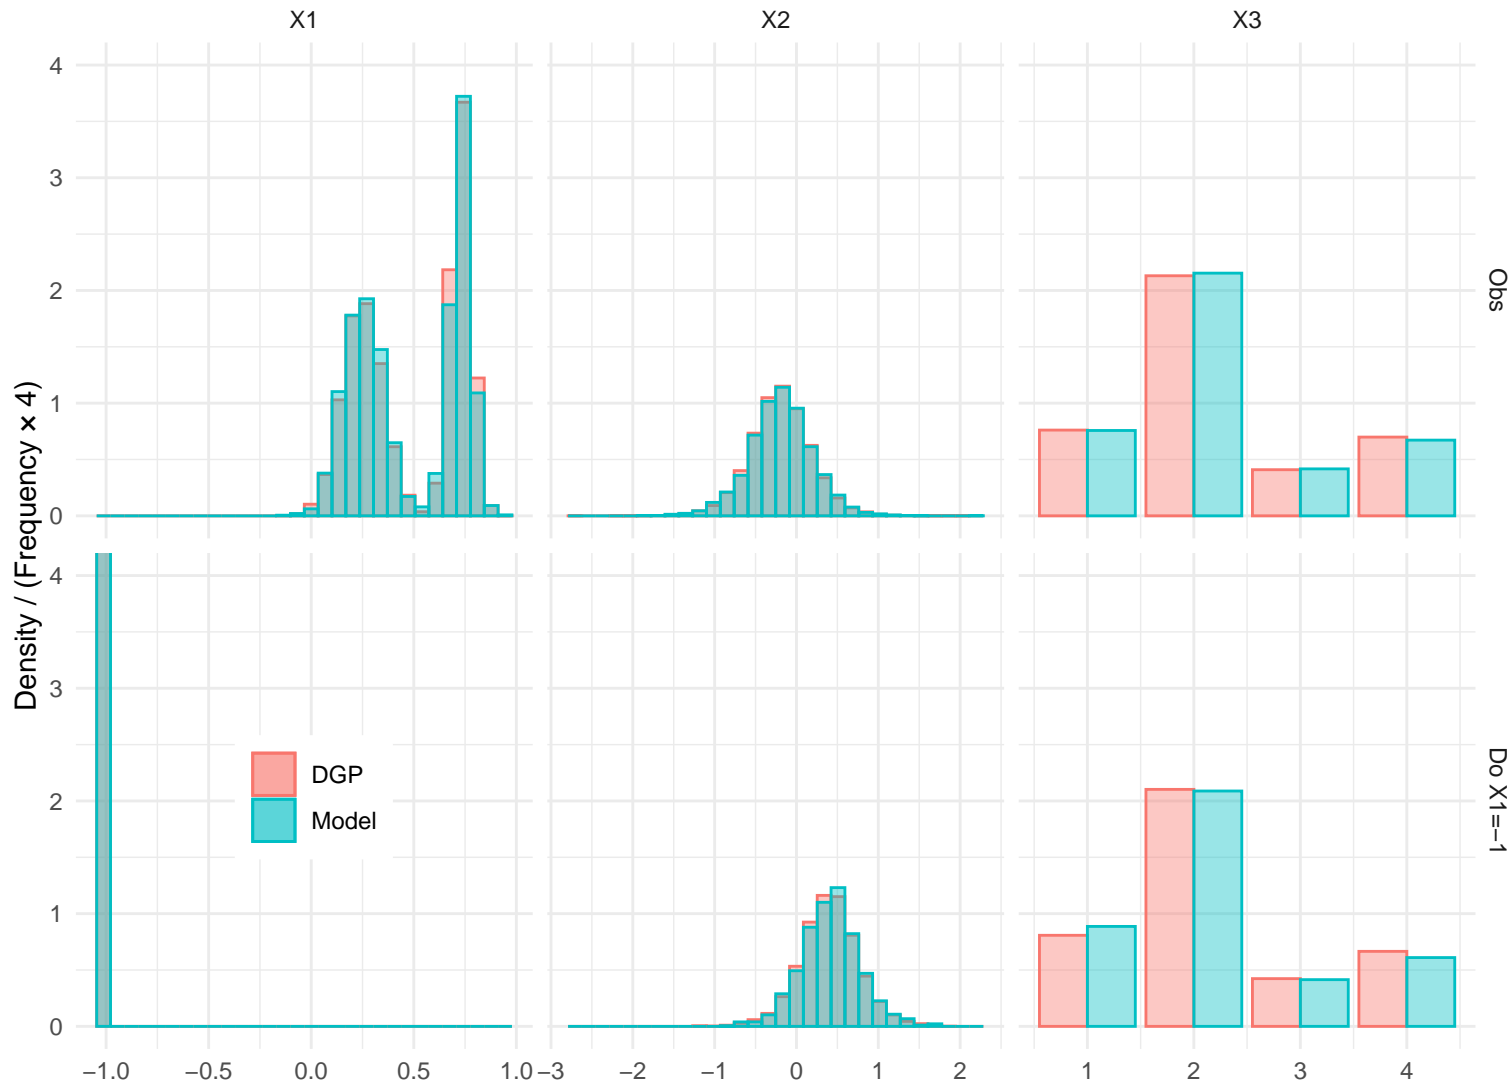

Supplement: supplementary_material [file attachment]

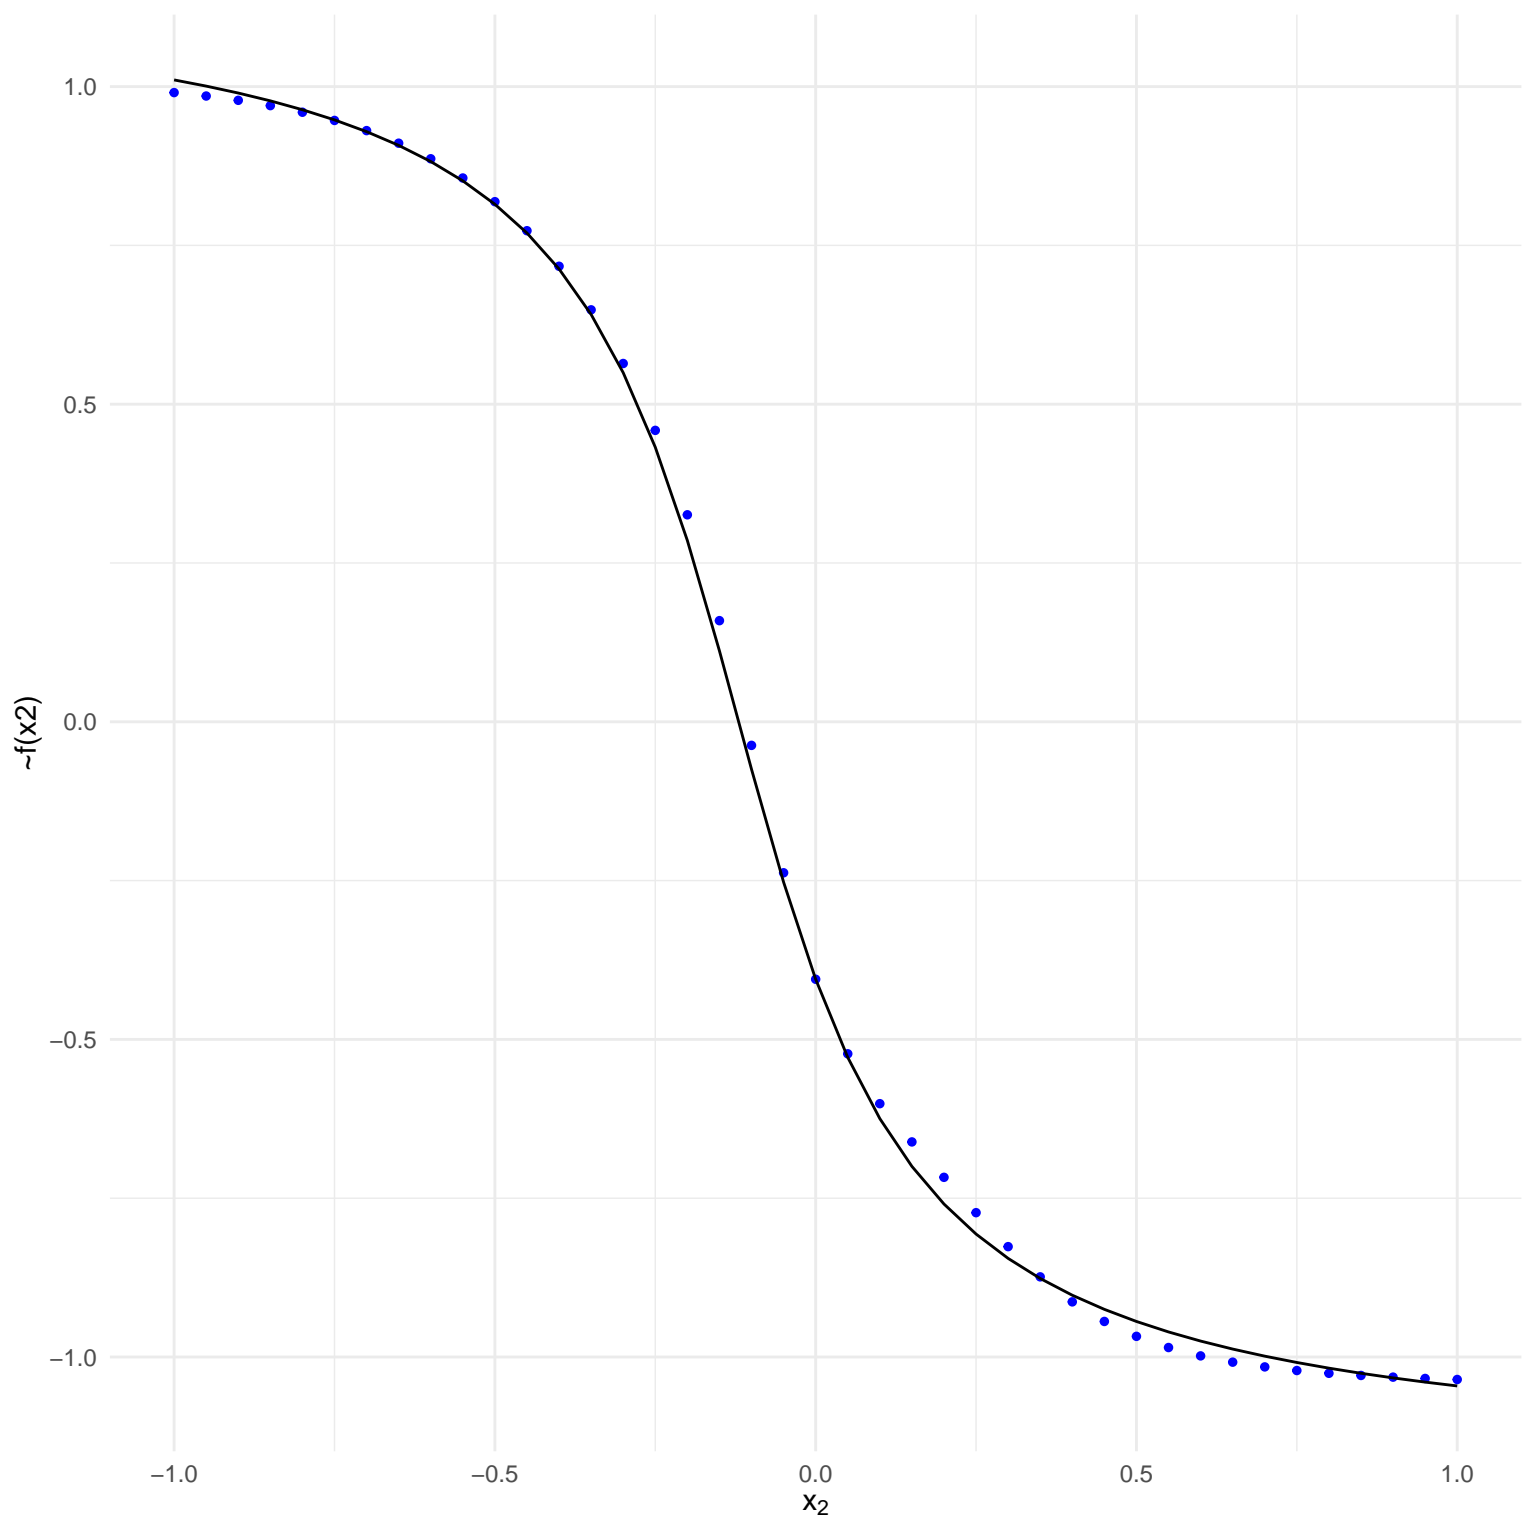

Supplement: supplementary_material [file attachment]

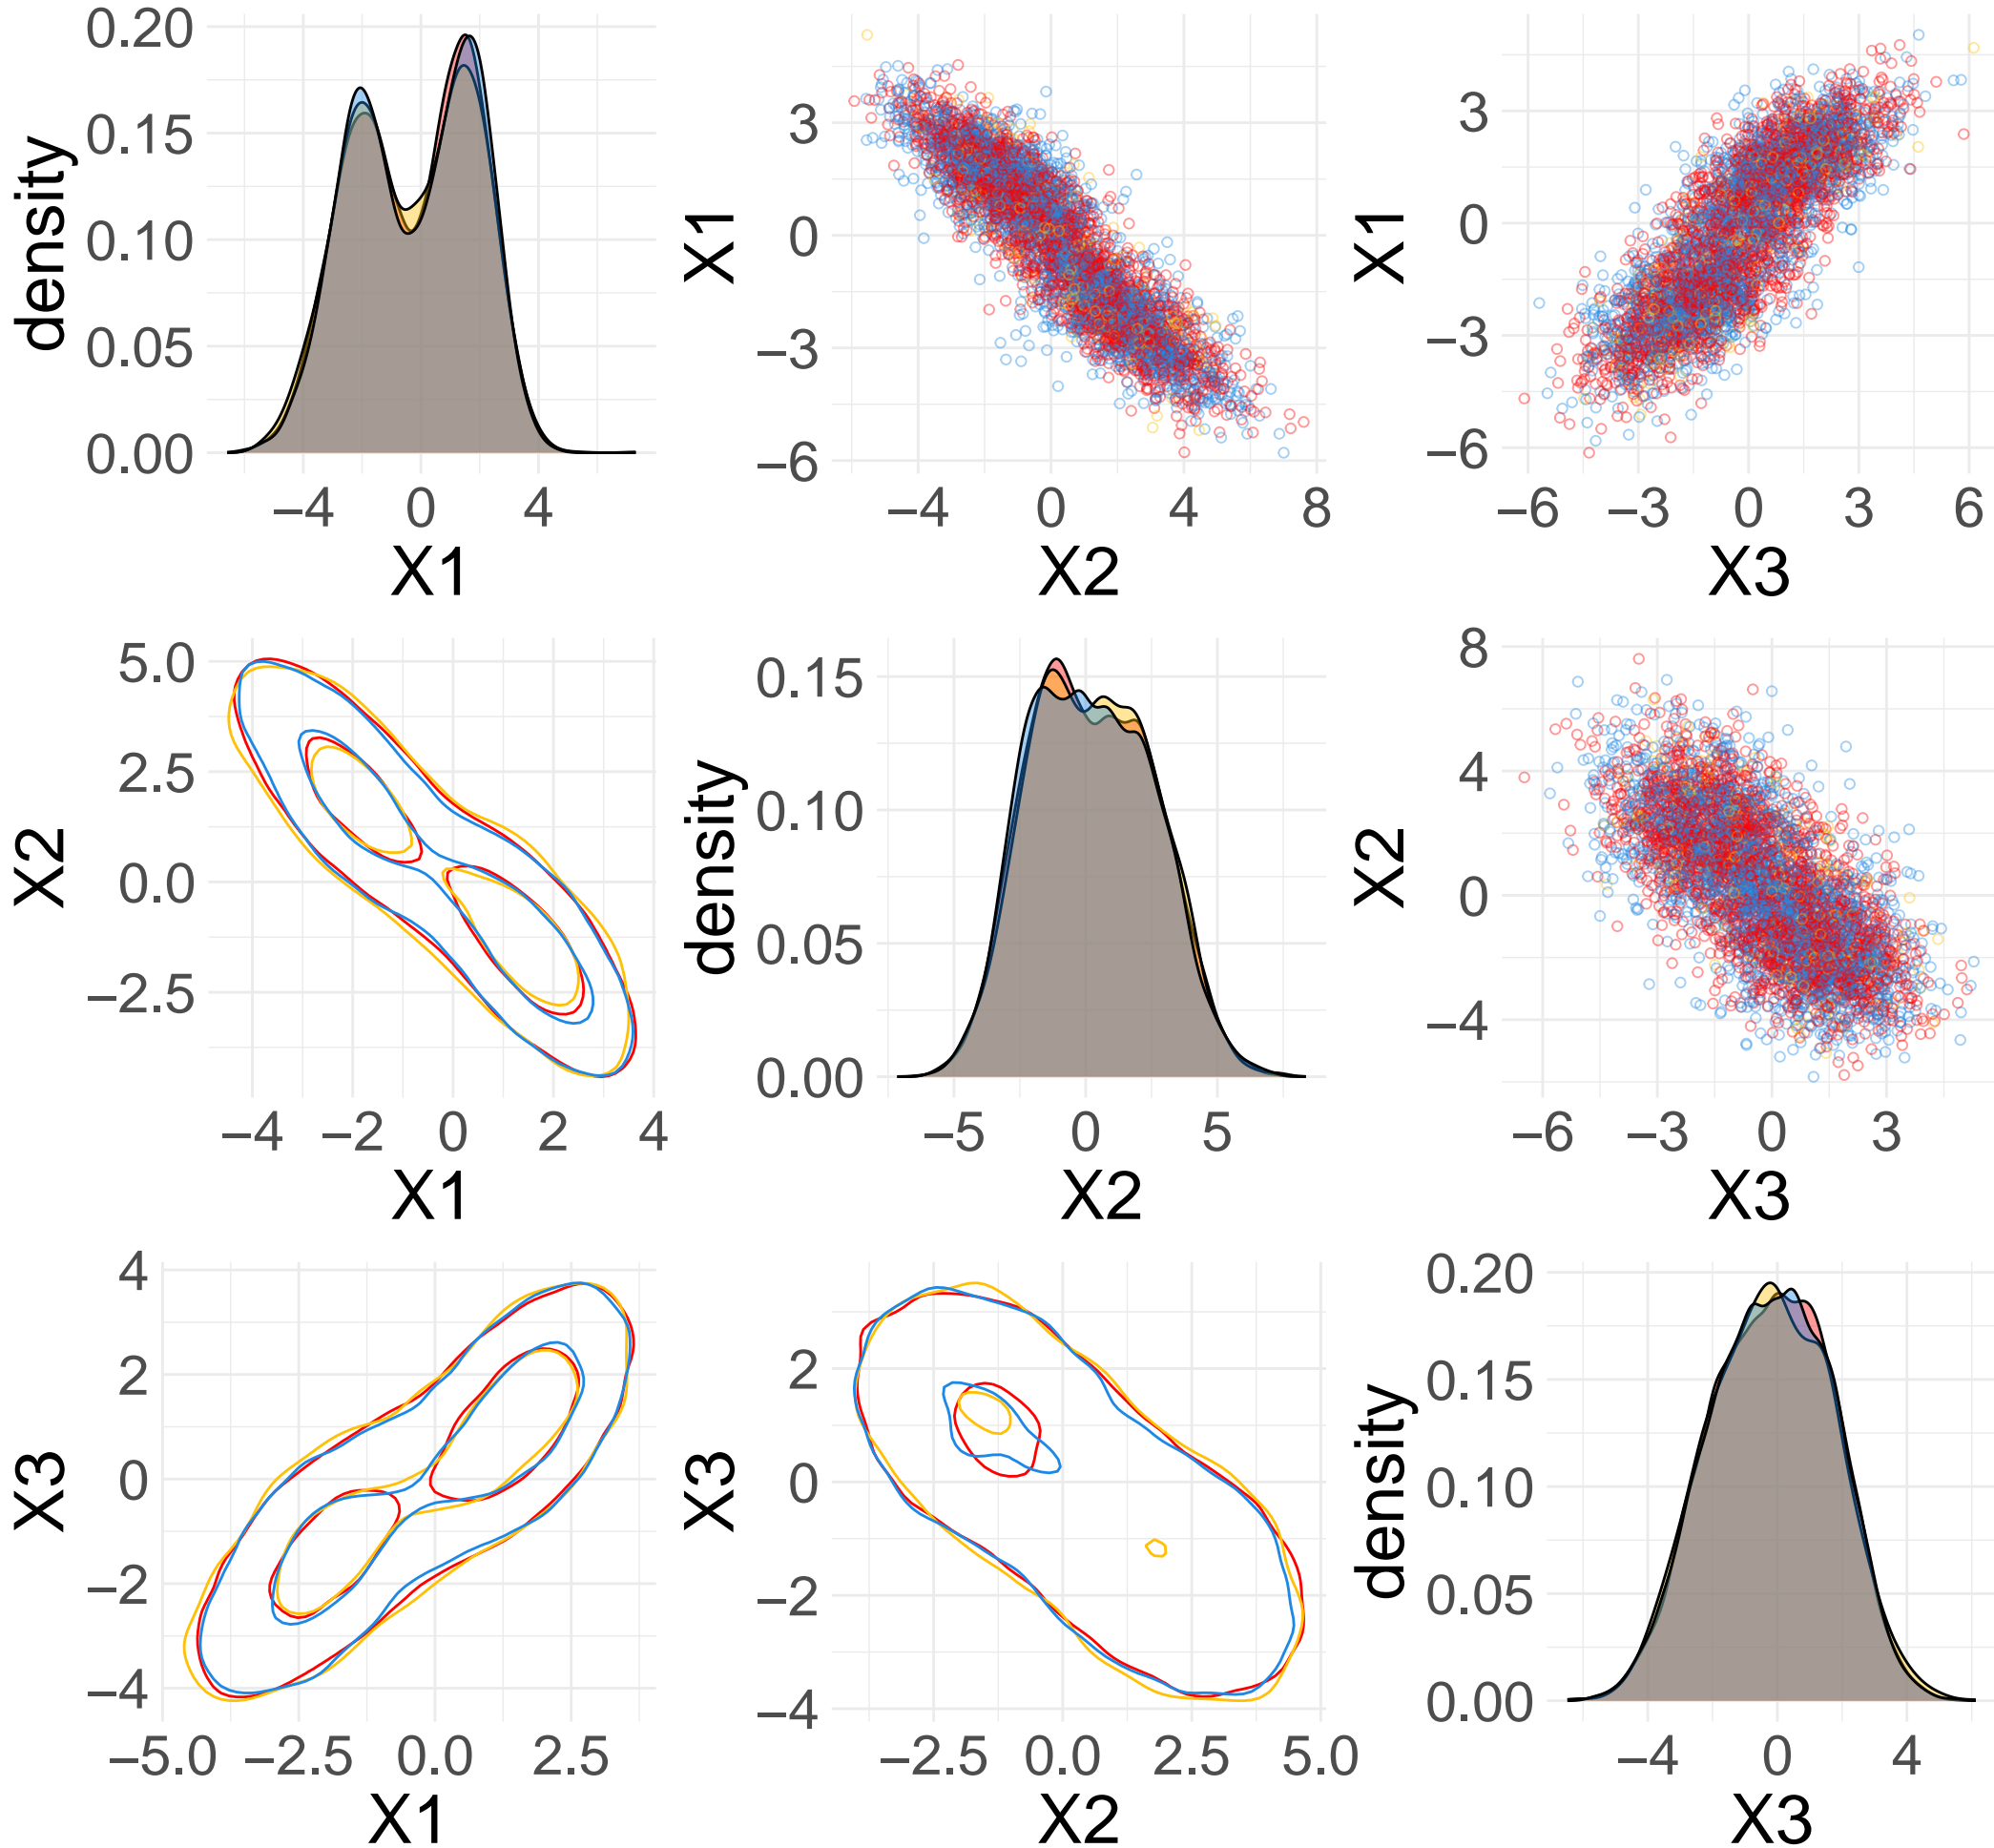

Methods ■ DGP ■ NSF ■ Ours

Supplement: supplementary_material [file attachment]

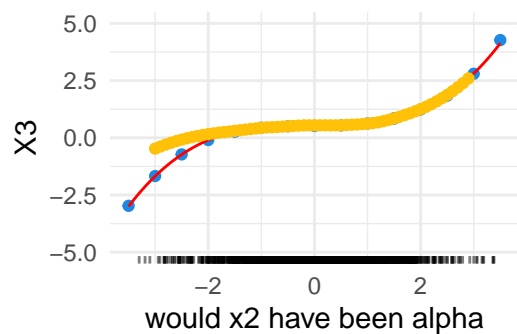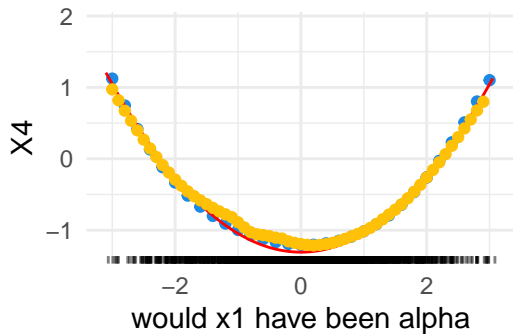

Methods   ● CAREFL   — DGP   ● Ours

Supplement: supplementary_material [file attachment]

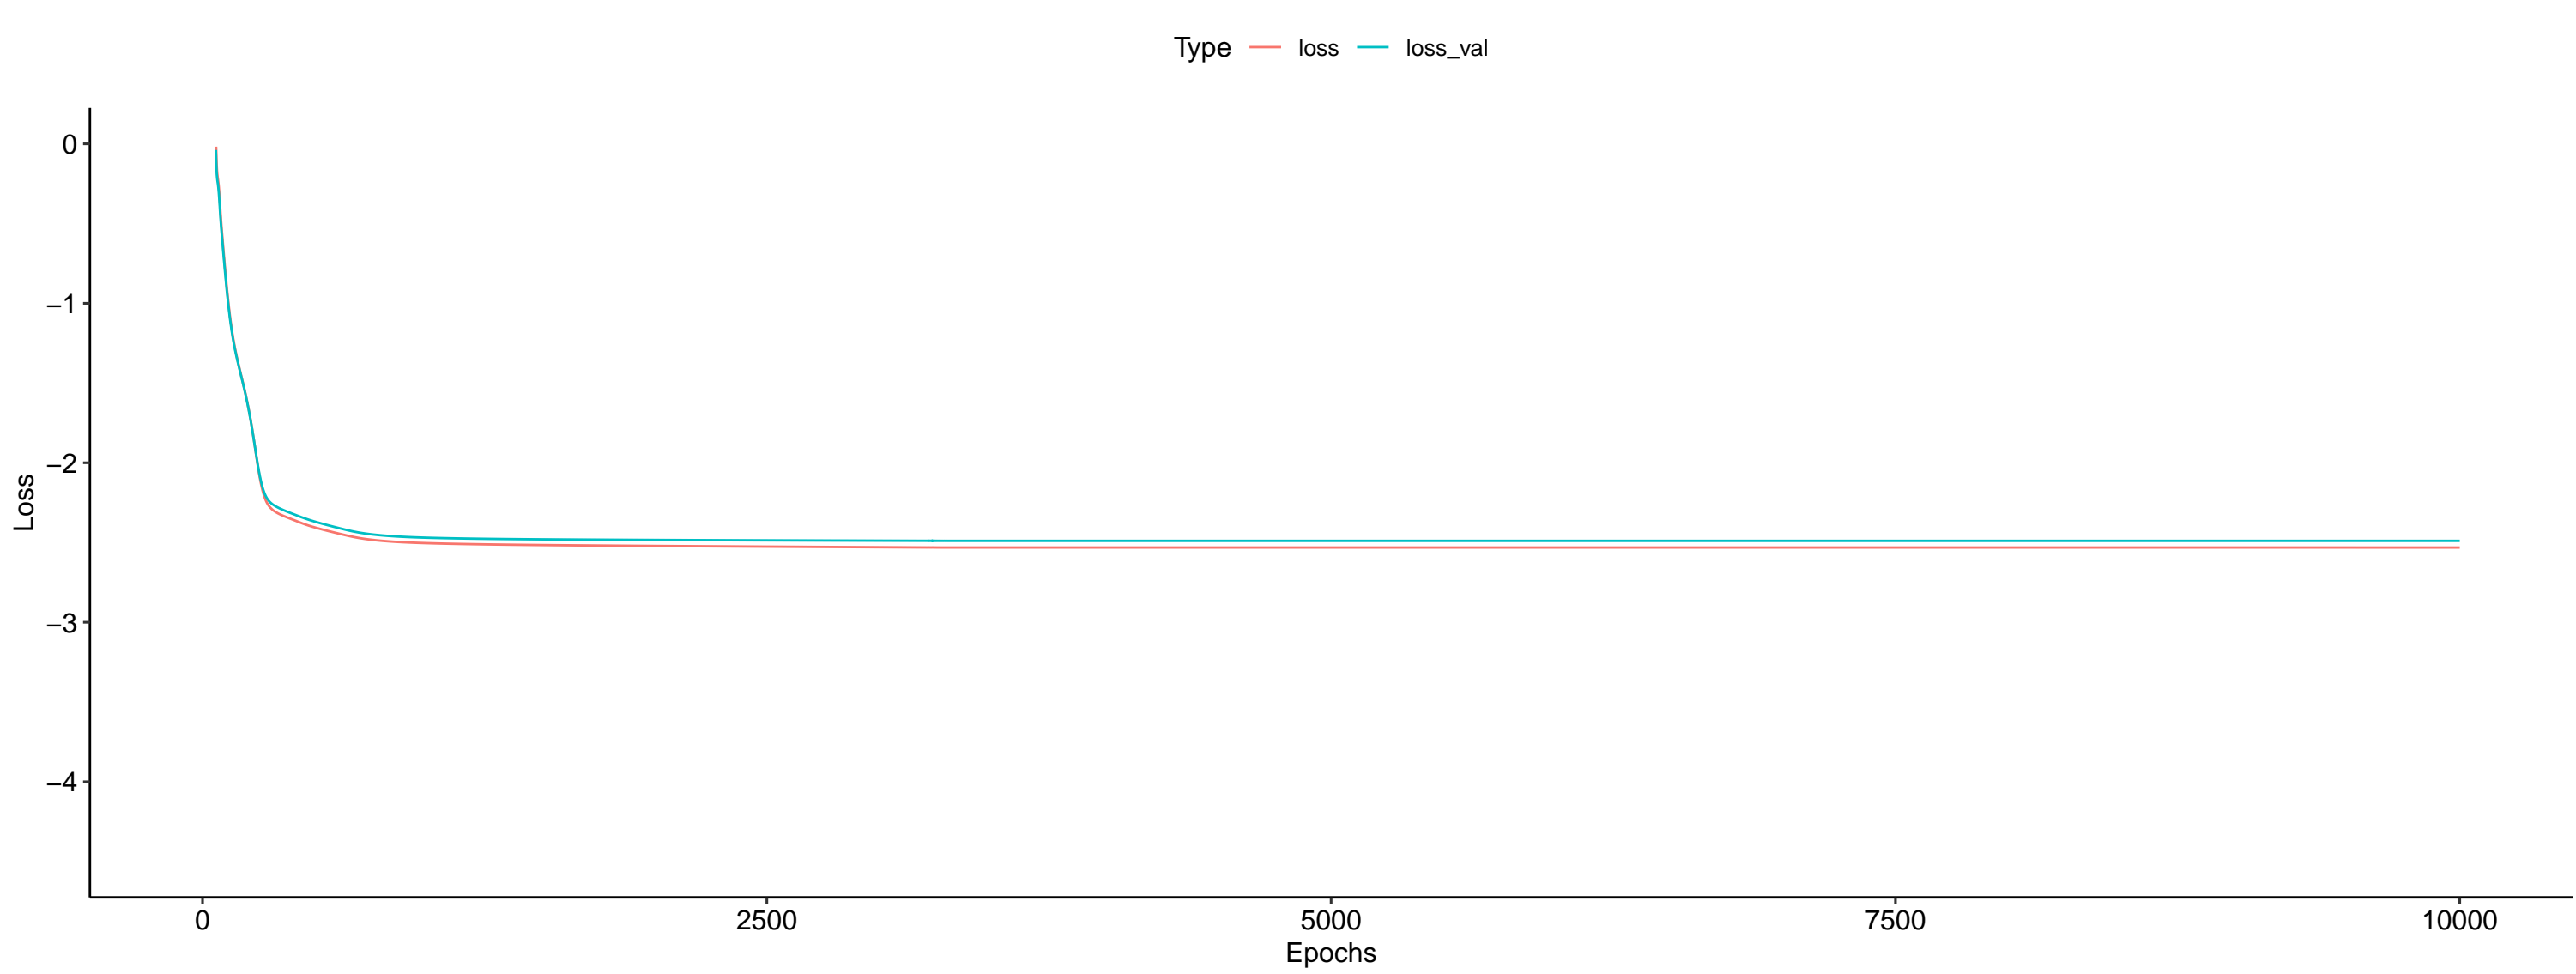

Supplement: supplementary_material [file attachment]
